# Supplementary material for: Enhanced extraction of organophosphorus pesticides from fruit juices using magnetic effervescent tablets composed of the NiFe2O4@SiO2@PANI-IL nanocomposites
Source: Royal Society of Chemistry journal article supplement (doi:10.1039/d0ra09100f), 2021-01-01
Supplement: d0ra09100f1.pdf [file d0ra09100f1.pdf]

### Supplementary figures

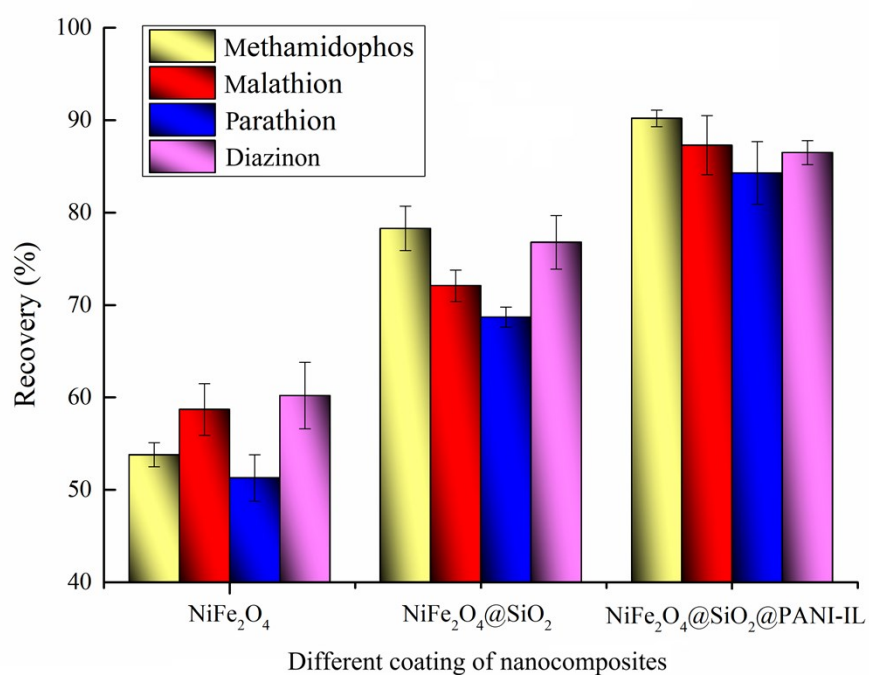

**Supplementary Fig. 1.** Comparison of the extraction efficiency for OPPs by the different coating of nanocomposites

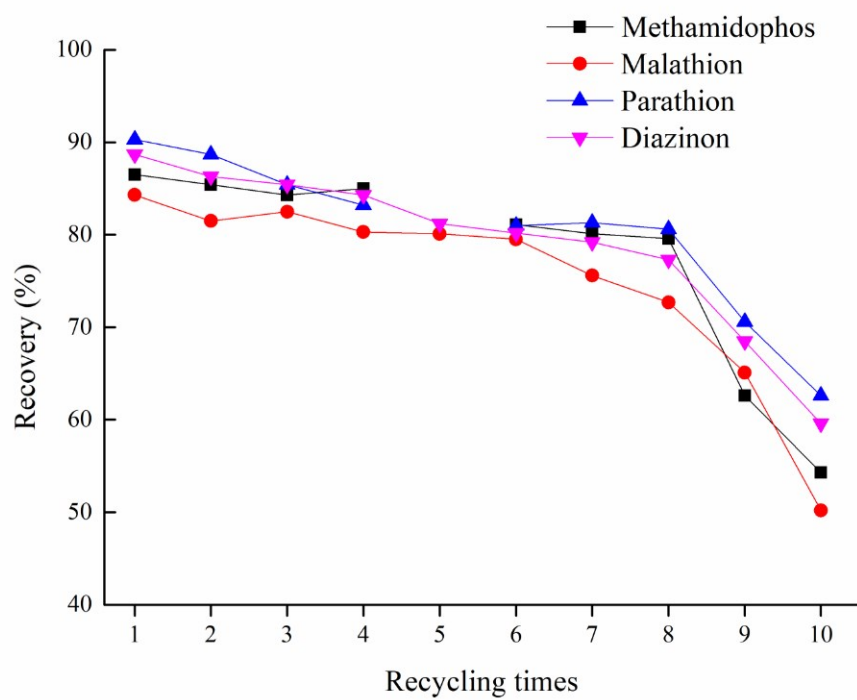

**Supplementary Fig. 2.** Recycling of the as-synthesized nanocomposites

**Supplementary Table 1.** Surface element percentages of NiFe<sub>2</sub>O<sub>4</sub>, NiFe<sub>2</sub>O<sub>4</sub>@SiO<sub>2</sub> and NiFe<sub>2</sub>O<sub>4</sub>@SiO<sub>2</sub>@PANI-IL

| Materials                                                       | O (atom %) | Fe (atom %) | Ni (atom %) | Si (atom %) | C (atom %) | N (atom %) |
|-----------------------------------------------------------------|------------|-------------|-------------|-------------|------------|------------|
| NiFe <sub>2</sub> O <sub>4</sub>                                | 53.13      | 22.47       | 14.03       | —           | —          | —          |
| NiFe <sub>2</sub> O <sub>4</sub> @SiO <sub>2</sub>              | 60.07      | 8.39        | 4.48        | 19.49       | —          | —          |
| NiFe <sub>2</sub> O <sub>4</sub> @SiO <sub>2</sub> @PAN<br>I-IL | 16.60      | 2.51        | 1.21        | 3.41        | 65.60      | 6.69       |

**Supplementary Table 2.** Pore size distribution and crystalline properties of as-prepared nanomaterials

| Materials                                                   | Surface area (m <sup>2</sup> /g) | Pore size (nm) | Pore volume (cm <sup>3</sup> /g) |
|-------------------------------------------------------------|----------------------------------|----------------|----------------------------------|
| NiFe <sub>2</sub> O <sub>4</sub>                            | 104.53                           | 13.74          | 0.302                            |
| NiFe <sub>2</sub> O <sub>4</sub> @SiO <sub>2</sub>          | 173.13                           | 14.11          | 0.059                            |
| NiFe <sub>2</sub> O <sub>4</sub> @SiO <sub>2</sub> @PANI-IL | 81.12                            | 17.94          | 0.136                            |
